# Supplementary material
Source: Springer Nature journal article supplement (https://www.springermedizin.de/resource/supplementary/13054_2013_2867_MOESM1_ESM.pdf/9714006)
Supplement: MOESM1 [file 9714006]

Assessed for eligibility  
(n = 194 )

Did not meet inclusion criteria (n = 48)

Met exclusion criteria (n = 89)

Declined participation (n = 16 )

Unable to locate family (n = 7 )

Randomized (n = 41)

Allocated to intervention (n = 20)

One excluded due to treating physician  
refusal

TTE study not available in one patient  
(died within 24 h)

Allocated to control group (n = 21)

TTE study not available in two patients  
(one died within 24 h, one discharged out  
of ICU before 48h)

Lost to follow-up (n = 0)

Analyzed (n = 19)

Lost to follow-up (n = 0)

Analyzed (n = 21)
